## Quantitative single cell heterogeneity profiling of patient derived tumor initiating gliomaspheres reveals unique signatures of drug response and malignancy

Michael Masterman-Smith<sup>ab</sup>, Nicholas A. Graham<sup>cd</sup>, Ed Panosyan<sup>ef</sup>, Jack Mottahedeh<sup>g</sup>, Eric E. Samuels<sup>h</sup>, Araceli Nunez<sup>i</sup>, Sung Hyun Lim<sup>f</sup>, Tiffany Phillips<sup>j</sup>, Meeryo Choe<sup>ejg</sup>, Koppany Visnyei<sup>l</sup>, William H. Yong<sup>n</sup>, Thomas G. Graeber<sup>op</sup>, Ming-Fei Lang<sup>q</sup>, Harley I. Kornblum<sup>ko</sup>, Jing Sun<sup>ab</sup>

<sup>a</sup> College of Medicine, Institute of Microanalysis, Dalian University, Dalian, Liaoning Province 116622, China

<sup>b</sup> Creative Sciences, Inc., Los Angeles, CA 90292

<sup>c</sup> Mork Family Department of Chemical Engineering and Materials Science, University of Southern California, Los Angeles, CA 90089 USA

<sup>d</sup> Norris Comprehensive Cancer Center, University of Southern California, Los Angeles, CA 90089 USA

<sup>e</sup> Department of Medicine, David Geffen School of Medicine, University of California at Los Angeles, LA, CA, 90024, USA

<sup>f</sup> Department of Pediatrics, David Geffen School of Medicine, University of California at Los Angeles, LA, CA, 90024, USA

<sup>g</sup> Department of Psychiatry, David Geffen School of Medicine, University of California at Los Angeles, LA, CA, 90024, USA

<sup>h</sup> Allergan Corporation, Irvine, CA 92612

<sup>i</sup> UCLA School of Nursing, University of California at Los Angeles, LA, CA, 90024, USA

<sup>j</sup> Department of Radiation Oncology, Cedars Sinai Medical Center, Los Angeles, CA

<sup>k</sup> Department of Neurology, David Geffen School of Medicine, University of California at Los Angeles, LA, CA, 90024, USA

<sup>l</sup> Dr. V Medical, Inc., Los Angeles, CA 90210, USA

<sup>m</sup> Department of Neurosurgery, David Geffen School of Medicine, University of California at Los Angeles, LA, CA, 90024, USA

<sup>n</sup> Department of Pathology and Laboratory Medicine, David Geffen School of Medicine, University of California at Los Angeles, LA, CA, 90024, USA

<sup>o</sup> Department of Molecular and Medical Pharmacology, David Geffen School of Medicine, University of California at Los Angeles, LA, CA, 90024, USA

<sup>p</sup> California NanoSystems Institute, University of California at Los Angeles, LA, CA, 90024, USA

<sup>q</sup> College of Environmental and Chemical Engineering, Institute of Microanalysis, Dalian University, Dalian, Liaoning Province 116622, China

Corresponding author: Jing Sun ([sunjing@dlu.edu.cn](mailto:sunjing@dlu.edu.cn))

Keywords: cancer stem cells, tumor initiating cells, glioblastoma, gliomaspheres, systems biology, microfluidics, PI3-kinase, EGFR, mTOR, TORC1, AKT, single cell analysis technology, heterogeneity profiling

Abbreviations: TBD

Additional File #1: Raw Dataset

Additional File#2: Supplementary Methods

Total words w/ abstract (total allowed 5000): 4363

Total words w/o abstract: 4014

Abstract (total allowed 350): 350

References (total allowed 50): 38

1 **Abstract**

2 **Background:** Glioblastoma is a deadly brain tumor with median patient survival of 14.6 months.

3 At the core of this malignancy are rare, highly heterogenous malignant stem-like tumor initiating  
4 cells. Aberrant signaling across the EGFR-PTEN-AKT-mTOR signal transduction pathways are  
5 common oncogenic drivers in these cells. Though gene-level clustering has determined the  
6 importance of the EGFR signaling pathway as a treatment indicator, multiparameter protein-level  
7 analyses are necessary to discern functional attributes of signal propagation. Multiparameter single  
8 cell analyses is emerging as particularly useful in identifying such attributes.

9 **Methods:** Single cell targeted proteomic analysis of EGFR-PTEN-AKT-mTOR proteins profiled  
10 heterogeneity in a panel of fifteen patient derived gliomaspheres. A microfluidic cell array ‘chip’  
11 tool served as a low cost methodology to derive high quality quantitative single cell analytical  
12 outputs. Chip design specifications produced extremely high signal-to-noise ratios and brought  
13 experimental efficiencies of cell control and minimal cell use to accommodate experimentation  
14 with these rare and often slow-growing cell populations. Quantitative imaging software generated  
15 datasets to observe similarities and differences within and between cells and patients.  
16 Bioinformatic self-organizing maps (SOMs) and hierarchical clustering stratified patients into  
17 malignancy and responder groups which were validated by phenotypic and statistical analyses.

18 **Results:** Fifteen patient dissociated gliomaspheres produced 59,464 data points from 14,866 cells.  
19 Forty-nine molecularly defined signaling phenotypes were identified across samples.  
20 Bioinformatics resolved two clusters diverging on EGFR expression ( $p = 0.0003$ ) and  
21 AKT/TORC1 activation ( $p = 0.08$  and  $p = 0.09$  respectively). TCGA status of a subset showed  
22 genetic heterogeneity with proneural, classical and mesenchymal subtypes represented in both  
23 clusters. Phenotypic validation measures indicated drug responsive phenotypes to EGFR blocking

24 were found in the EGFR expressing cluster. EGFR expression in the subset of drug-treated lines  
25 was statistically significant ( $p < .05$ ). The EGFR expressing cluster was of lower tumor initiating  
26 potential in comparison to the AKT/TORC1 activated cluster. Though not statistically significant,  
27 EGFR expression trended with improved patient prognosis while AKT/TORC1 activated samples  
28 trended with poorer outcomes.

29 **Conclusions:** Quantitative single cell heterogeneity profiling resolves signaling diversity into  
30 meaningful non-obvious phenotypic groups suggesting EGFR is decoupled from AKT/TORC1  
31 signalling while identifying potentially valuable targets for personalized therapeutic approaches  
32 for deadly tumor-initiating cell populations.

### 33 34 **Introduction**

35  
36 The cell of origin for many cancers is a specific, rare subset of cancer cells responsible for  
37 tumor initiation, cellular heterogeneity and various features that underlie the malignant nature of  
38 the cancer types which they have been identified in. (1,2) Among those cancers with a cancer  
39 stem cell origin is the highly malignant and deadly glioblastoma brain tumor. Patients have a  
40 median survival of 14.6 months from diagnosis and five year survival is an abysmal 5%. (3)

41 Patient glioblastoma tumors yield relatively stable cancer stem-like, tumor initiating cell  
42 populations which retain some of the phenotypical and genetic heterogeneity of the cancers they  
43 produce *in vitro*. (4) Being able to recover these cells from patient biopsies *in vitro* are a robust  
44 predictor of clinical progression and outcome. These cells additionally serve as useful substrates  
45 for drug discovery and to determine the essential molecular signaling landscape contributing to *in*  
46 *vivo* malignancy and resistance. (5,6)

47 The mechanisms underlying gliomasphere malignancy can be defined by pathway  
48 redundancies in the biological systems controlling states of oncogenic activation in cancer cells

49 and their cancer initiating subtypes. (4,5) Signaling along the EGFR-PTEN-AKT-TORC1  
50 signaling axes provide phenotypic features in gliomasphere cell populations. (7) These pathways  
51 are especially important in governing cellular fate decisions by transmitting signals controlling  
52 survival, self-renewal, growth, proliferation, metabolism, glycolytic adaptation, drug efflux and  
53 symmetric division, among other essential features. (8) (9) (10) (11) Targets of EGFR signaling  
54 have long been the therapeutic and diagnostic targets of glioblastoma which extends into the era  
55 of cancer immunotherapy, which utilizes EGFR in chimeric antigen receptor (CAR) T-cell therapy.  
56 (12,13)

57 Clustering gliomasphere models according to The Cancer Genome Atlas (TCGA)  
58 classification system has provided insight into the genetic landscape of gliomaspheres. (10)  
59 Mesenchymal and non-mesenchymal gliomasphere subtypes have been delineated with non-  
60 mesenchymal gliomaspheres consisting of both classical and proneural subtypes. (11) Other  
61 studies have found gliomasphere models cluster according to a lower malignancy proneural and  
62 higher malignancy mesenchymal classification with proneural status conferring phenotypes with  
63 lower sphere formation and improved survival in *in vivo* xenografts of gliomaspheres. (14,15)

64 Based on the gene-level mutations, EGFR mutations (including point mutations,  
65 amplifications, rearrangements, and alternative splicing) are found in all subtypes of glioblastoma  
66 and are present in 57% of glioblastoma (7,16,17). At the protein level, cellular EGFR expression  
67 is tightly controlled in normal but not in cancerous cells by epigenetic regulation and protein  
68 degradation pathways, leading to overall high EGFR protein levels (18,19). These findings indicate  
69 that the gene-level mutations of EGFR and its protein-level expression can be vastly different.

70 Given the discrepancies between the gene-level mutations and the protein-level expression  
71 of EGFR and other molecules in the EGFR signaling pathways, it is important to detect the protein

72 level changes in gliomasphere. Multiparameter single cell measurement of EGFR, PTEN,  
73 activated AKT and TORC1 signaling had been used previously to aggregate and identify  
74 prognostic glioblastoma subtypes. (20) By extending this methodology across a panel of patient-  
75 derived gliomasphere samples, we sought to observe and detail the signaling diversity within this  
76 stem-like subset of cells. In measuring this native signaling heterogeneity and deploying cluster-  
77 based analyses with comparison to genotypic and phenotypic descriptors, features of response and  
78 target characterization can be observed.

79

## 80 **Results**

### 81 *Experimental design*

82 Patient glioblastoma tumors (**Fig. 1A, left**) were dissociated and placed in defined serum  
83 free enrichment media to select for *in vitro* growth and expansion of gliomaspheres as  
84 neurospheres (**Fig. 1A, middle, right**). After stem-like cell selection and enrichment, neurospheres  
85 are dissociated into single cells and loaded into chambers of microfluidic cell array chips for  
86 quantitative immunocytochemical staining and imaging (**Fig. 1B, left, Supplementary Methods**).  
87 Imaging software quantifies the average fluorescent intensity from each cell for each defined  
88 biomarker as the means to reflect individual cellular protein concentration (**Fig. 1B, middle**).  
89 Bioinformatic analysis of a dataset of all cells from a series of samples resolves complex intra-  
90 and -inter sample signaling heterogeneity. The resulting data is validated with genotypic and  
91 phenotypic measures to assess functional status (**Fig. 1C, bottom right**).

92

### 93 *Heterogeneity profiling of patient-derived gliomaspheres*

94 A series of bioinformatic steps quantified individual and multiparameter, parallel datasets  
95 to characterize and discern cellular heterogeneity among cells and patients.. In total, 14,866 cells  
96 (mean = 991 cells/line), produced 59,464 individual data points from fifteen human gliomasphere  
97 lines (**Supplemental Table 1**). Pairwise average linkage using Pearson correlation clustering of  
98 individual protein expression vectors EGFR, PTEN, pAKT and pS6 identified reasonable  
99 correlation coefficients between PTEN and pS6 and pAKT and pS6 (**Fig. 2A**). Boxplots of single  
100 cell expression of these markers for each sample revealed unique sample diversity and substantial  
101 molecular and cellular heterogeneity (Fig. 2B). Boxplots of all cells showed the spread of values  
102 for each marker in the dataset, showing, while individual parameters were not skewed, there  
103 existed a wide distribution of values for each marker (**Fig. 2B**). Self-organizing maps (SOMs)  
104 resolved forty-nine unique molecular phenotypes across patients (**Fig. 2C**). Unsupervised  
105 hierarchical clustering based on neighborhood frequency vectors (NFVs) of self-organizing map  
106 (SOM) projections in Fig. 2C yielded two predominant clusters (**Fig. 3B-3C**). By taking the  
107 average biomarker intensity of all cells in each cluster, two quantitative multiparameter signaling  
108 phenotypes emerged (**Fig. 3C, Supplemental Methods**).

109 Identified clusters revealed Cluster I to be characterized by significantly high EGFR  
110 expression ( $p = 0.0003$ ) with decreased pAKT and TORC1 in comparison to Cluster II, which had  
111 lower EGFR expression and higher pAKT and pS6 levels ( $p = 0.08$ , and  $p = 0.09$  respectively).  
112 PTEN expression was statistically insignificant and barely discernible between clusters.

113

114 *TCGA grouping of gliomaspheres reveal genotypic heterogeneity in clusters*

115 The Cancer Genome Atlas (TCGA) subgroupings were available on twelve of fifteen  
116 gliomasphere samples across the EGFR expressing Cluster I (5/7 samples, 71.4%) and

117 AKTAKT/TORC1 activated Cluster II (7/8 samples, 87.5%) (**Fig. 3A**). The EGFR expressing  
118 Cluster I had two proneural samples (2/5, 40.0%), two classical samples (2/5, 40.0%) and one  
119 mesenchymal sample (1/5, 20.0%). Isocitrate dehydrogenase 1 gene mutations (IDHR1324) were  
120 found in both proneural samples in this cluster (patients 2 and 3). (21) Within the  
121 AKTAKT/TORC1 activated Cluster II, there were three classical samples (3/7, 42.8%), three  
122 proneural samples (3/7, 42.8%) and one mesenchymal sample (1/7, 14.2%) (**Supplemental Table**  
123 **2**).

124

125 *High EGFR expressing Cluster I samples are responsive to EGFR inhibition*

126 Visualization of single cell EGFR expression profiling revealed a broad diversity in EGFR  
127 expression (**Fig. 3A**). A randomly selected subsample of seven gliomasphere lines, all of which  
128 were either proneural or classical samples, were tested for response to the EGFR blocker erlotinib  
129 (**Fig. 3B**). LC<sub>50</sub> measurements of sphere size and sphere number showed EGFR expression Cluster  
130 I had lower LC<sub>50</sub> and high AKTAKT/TORC1 Cluster II had higher LC<sub>50</sub>s (Sphere size: Cluster I  
131 LC<sub>50</sub> mean = 0.26μM, Cluster II LC<sub>50</sub> mean = 3.27μM. Sphere number: Cluster I LC<sub>50</sub> mean =  
132 0.33μM, Cluster II LC<sub>50</sub> mean = 5.22μM). Non-parametric Mann-Whitney U tests on LC<sub>50</sub>s of  
133 sphere size and sphere number showed significant response to EGFR blockade in EGFR  
134 expressing Cluster I in comparison to AKTAKT/TORC1 activated Cluster II (Sphere size,  $p =$   
135 0.029, SD = 3.57, two-tailed; Sphere number  $p = 0.029$ , SD = 5.81). Though significant differences  
136 in sphere size and sphere number were found, the large standard deviation prohibits definitive  
137 discrimination between clusters. Significant differences were found in mean EGFR expression  
138 and borderline significance in median EGFR expression within this subsample of drug-treated



139 lines, indicating a relationship between receptor expression and drug response ( $p = 0.0418$  mean,  
140 0.0501 median, T test, unpaired, 2-sided, unequal variance) (**Supplemental Information**).

141

142 *Molecularly defined clusters differed in malignancy response*

143 Sphere formation efficiency was measured as an *in vitro* means to assess tumor initiation  
144 potential in a random subsample of five gliomasphere lines from each cluster which included  
145 proneural, classical and mesenchymal samples. (**Fig. 3C**). Non-parametric Mann-Whitney U  
146 tests of sphere formation efficiency showed significantly higher sphere formation efficiency in  
147 AKTAKT/TORC1 activated Cluster II in comparison to EGFR expressing Cluster I ( $p = .0159$ ,  
148 SD = 139.04). Though statistically significant, the standard deviation was quite large for definitive  
149 discrimination between clusters.

150 Kaplan-Meier curves were generated based on progression free survival and overall  
151 survival of patients gliomasphere lines were derived from (**Supplementary Figure 4b**). Though  
152 there were trends of better prognosis in EGFR expressing Cluster I and poorer prognosis in  
153 AKT/TORC1 activated Cluster II, hazard ratios for these outcome measures were not statistically  
154 significant in predicting prognosis.

155

## 156 **Discussion**

157

158 Single cell analysis for the purposes of cellularly heterogeneity profiling is becoming  
159 increasingly relevant for diagnostics, drug discovery, preclinical drug development, and basic and  
160 translational research. (20,22) It is an important methodology for the dissemination and  
161 categorization of complex cellular heterogeneity and to improve life sciences research and  
162 development in fields where rare cells may be involved in natural and disease processes. These  
163 sensitive analyses are becoming particularly relevant in cancer stem cell biology to understand the

164 extreme cellular, molecular and genetic heterogeneity and additionally identify potential targetable  
165 cell populations. (23,24) Single cell datasets often achieve a greater resolution than uniparameter  
166 analysis because, embedded in the methodology, are detailed examinations of the relationships  
167 between nodes in the oncogenic networks studied. With the increasing incorporation of sensitive  
168 multiparameter single cell analysis technologies such as CyTOF and DNA barcoding to study  
169 putative tumor initiating cells, the methodologies have been deployed to observe putative brain  
170 cancer stem cells in parental tumors and characterize inherent molecular and functional  
171 heterogeneity and fates of these elusive yet highly malignant cells. (25,26)

172 Patient derived spheroid model systems may help define targetable cell subpopulations  
173 responsible for tumor initiation and malignancy. However, the cells, in the two decades since their  
174 identification, remain ambiguous to characterize and therapeutic interventions, for the range of  
175 malignant cancers they have been proposed to initiate, are still a challenge. In this study, we sought  
176 to focus on the contribution of EGFR signaling on downstream AKT-TORC1 signaling pathways  
177 in gliomaspheres to discern inter- and intra- sample similarities and differences in these pathways.

178 LC<sub>50s</sub> of EGFR inhibition based on sphere number and sphere size revealed EGFR  
179 expressing Cluster I samples to be drug responsive in comparison to AKTAKT/TORC1 activated  
180 Cluster II cells. Mean EGFR expression of treated samples differed significantly between clusters  
181 indicating a predictive target-response relationship of EGFR expression to inhibition.. This finding  
182 is in itself important as the evolution of computational target-response modelling is becoming an  
183 important component in drug development to screen out potential candidate failures as early as  
184 possible and move efficacious candidates to market quicker at reduced costs. The finding is  
185 consistent with other EGFR blocking studies in patient derived gliomasphere models in achieving  
186 reduced sphere growth. It alsolends downstream mechanistic insight into why some gliomaspheres

187 grow and proliferate in the absence of exogenous mitogen EGF supplementation and recover from  
188 EGFR blocking action. (27)

189 *In vitro* sphere formation assays, as a measure of tumor initiation potential, revealed the  
190 high EGFR expressing Cluster I to have lower sphere forming efficiency in comparison  
191 AKT/TORC1 activated signature. A Within the EGFR expressing samples a range of sphere  
192 formation efficiencies were found suggesting potential heterogeneity within this population. And  
193 although AKT/TORC1 had high sphere forming potential suggesting greater malignancy and  
194 perhaps complexity, the samples revealed uniform phenotypes on this measure.

195 Cluster based heterogeneity profiling did not significantly predict progression free survival  
196 or overall survival in patients (**Supplemental Figure 4b**). Perhaps this may be due to a low  
197 number of samples or limited number of parameters. However, the high EGFR Cluster I showed  
198 trends of improved prognosis and AKT/TORC1 activated Cluster II trended towards poorer  
199 prognosis. Taken together with *in vitro* sphere efficiency assays, the methodology employed  
200 suggest these signaling phenotypes may play a role in meaningfully distinguishing populations. It  
201 has been found AKT and TORC1 activation are key drivers of malignancy, reactivation, treatment  
202 resistance and response phenomena. (28) Thus, the identity of a therapeutic foci in gliomaspheres  
203 may come to be of use in modeling interventions at these cells. (29)

204 The clusters consisted of proneural, classical and mesenchymal TCGA groupings. All  
205 EGFR expressing Cluster I proneural gliomaspheres had mutations in the isodehydrogenase  
206 isocitrate dehydrogenase (IDH1) gene, while all AKT/TORC1 activated Cluster II proneural  
207 gliomaspheres did not harbor this mutation. Given IDH1 mutations are a feature of lower grade  
208 brain tumors, consistent with the sphere forming ability of these samples. Additionally, through

209 recent evidence from other single cell analytical techniques, IDH1 mutation has been observed as  
210 a feature of EGFR amplification, suggesting this clustering is reasonable. (30)

211 It is relevant to recognize bulk, uniparameter or quantitatively insensitive cell metrics could  
212 have obscured subtle yet crucial, informative molecular differences in the cells which  
213 multiparameter single cell clustered datasets resolve. Correlative analysis of individual proteins,  
214 while identifying potentially meaningful correlations, could not reveal the level of cellular  
215 complexity this type of multiparameter, parallel analyses was able to discern in terms of the  
216 phenotypes identified. Of note, while some parameters studied did not reach statistical  
217 significance, they were still vital to resolving phenotype clusters. The activated states of AKT and  
218 TORC1, while of only borderline statistical significance, proved essential to distinguishing clusters.  
219 This is an important consideration given dual inhibition of these targets has shown evidence of  
220 therapeutic potential. This additionally supports an emerging understanding of low TORC1  
221 activation is a defining and essential characteristic of gliomasphere and cancer stem cell phenotype  
222 maintenance. (31) (27)

223 This study was limited by a modest number of samples analyzed. Parallel analysis is a  
224 powerful approach to single cell heterogeneity analysis capacities, and 15 samples tested the  
225 minimal number of samples needed to quantify these valuable cells for definitive global  
226 understanding of this cell subtype. Sample number may have reduced statistical significance of the  
227 markers tested and suggested trends, but did not achieve statistically significant prognostic  
228 indication, latter particularly a measure to definitively prove these pathways as essential  
229 malignancy drivers of these cells (Supplementary Information). (6) (32) PTEN was statistically  
230 insignificant in gliomasphere lines and thus proteomic mapping capacities relied on only three  
231 markers tested. Despite these limitations, this study did indeed provide insight into the clear utility

232 of quantitative single cell heterogeneity profiling and parallel analysis of these specific pathways  
233 contribute to and resolve molecular drivers of the cancer stem-like state and targeting of these cell  
234 populations.

## 235 236 **Materials and Methods**

### 237 238 *Microfluidic cell array chips*

239 Each cell array chip consists of 24 (3 x 8) chambers, each with dimensions of 8 mm (l) x 1  
240 mm (w) x 120  $\mu$ m (h) and total volume of 960 nL (**Fig. 1B**). Single cell suspension, culture media,  
241 and reagents were introduced and removed at chip ports by electronic, handheld semi-automated  
242 pipettor at 6 $\mu$ L/second to protect cells from shear forces and enable flexible reagent and cell control.

### 243 244 *Cell array chip construction*

245 The cell array chip is fabricated by directly attaching a polydimethylsiloxane (PDMS)-  
246 based microfluidic component onto an uncoated glass microscope slide. The microfluidic  
247 component was fabricated using a soft lithography method. Well-mixed Sylgard 184 PDMS  
248 (Corning Inc., A:B = 10:1 ratio) were poured onto a silicon wafer replicate of photolithographically  
249 defined microchannel patterns, vacuum degassed and allowed to harden overnight in 80°C oven.  
250 The microfluidic component was then peeled off the silicon wafer, edges cut with razor tool  
251 (Stanley, Inc.) and holes punched with pipette tip size-matched diameters at the ends of the  
252 microchannels. Direct attachment to uncoated glass slide was accomplished via pretreatment with  
253 oxygen plasma of bottom of microfluidic PDMS chip and top of uncoated microscope slide. The  
254 assembled chip was then baked in an 80°C vacuum oven for 24 hours. Prior to use, the chips were  
255 sterilized by exposure to UV light for 15 minutes.

256

257 *Microfluidic chip cell loading and handling*

258 To prepare microfluidic chips for cell loading, matrigel at 1:20 (BD Biosciences, Inc.) was  
259 used as a cell capture reagent and loaded into chambers for 12 hours at 8°C then washed with PBS.  
260 Although precise cell densities at time of loading were dependent on individual sample  
261 gliomasphere growth characteristics, cells were dissociated using TrypLE (Invitrogen), spun down  
262 at 1200 RPM for 1 min and pelleted, then resuspended at a density of 50 to 500 cells/ $\mu$ L for a 100-  
263 1000  $\mu$ L aliquot containing single cells with media in a 1.5mL tube (Eppendorf, Inc.). The tubes  
264 were triturated with Matrix pipettor and 2 $\mu$ L of cell suspension was loaded per matrigel pretreated  
265 microfluidic chamber. Three chambers were loaded per gliomasphere sample. Chips were then  
266 spun at 1000 RPM for 1 minute to assure all cells would fall into the same Z-plane for imaging.  
267 Chips were then placed in a 10-cm Petri dish with 1 mL double-distilled water (for hydration) and  
268 incubated in a 5% CO<sub>2</sub>, 37°C incubator for 10 minutes prior to on-chip quantitative  
269 immunocytometry.

270

271 *Gliomasphere models*

272 Collection of patient tumor tissue for the derivation of gliomaspheres was approved by the  
273 Institutional Review Board of UCLA. Briefly, tumors were washed, minced with a scalpel blade,  
274 digested with TrypLE (Invitrogen) for 5 minutes and spun down at 1200 RPM for 5 minutes.  
275 TrypLE was removed and tumor pieces were resuspended in chilled DMEM-F12 (Invitrogen),  
276 dissociated with at least 2 glass pasteur pipets (Fisher Brand) fire polished to successively smaller  
277 bores and put through a 70 $\mu$ m and 40 $\mu$ m cell strainers (BD Biosciences). A Percol (GE Health  
278 Sciences) protocol was employed to remove red blood cells. (6)

279 Cells were seeded at a density of 100,000 cells/mL in a stem cell growth and enrichment  
280 medium consisting of DMEM/F12 medium supplemented with 1:50 B27 (Invitrogen), 20 ng/ml  
281 bFGF (Peprotech), 50 ng/mL EGF (Peprotech), 1:100 penicillin/streptomycin (Invitrogen), 1:100  
282 Glutamax (Invitrogen) and 5 ug/ml heparin (Sigma-Aldrich). Heparin, bFGF and EGF were  
283 supplemented weekly and Glutamax bi-weekly. Media was changed upon passaging or when  
284 media became acidic. Passaging was done according to visual observation when the majority of  
285 neurosphere aggregates were observed to merge into larger aggregates. Spheres were passaged  
286 into fresh media following either enzymatic dissociation with TrypLE and glass pipet dissociation  
287 or chopping using an McElwin automated tissue chopper (Geneq. Inc.). (1)(6)

288

#### 289 *Quantitative microscopic imaging*

290 Optimization protocols were developed for assessment of phosphorylation of ribosomal  
291 protein S6 for EGFR (Hylite 750nm) and PTEN (555nm) and activated downstream  
292 phosphorylation of AKT (Alexa 647nm) and TORC1 (via readout of activated phosphorylated S6  
293 (Alexa 488nm)) (See **Supplemental Methods**). Microfluidic cell array chips facilitated cell and  
294 reagent control and improved signal-to-noise ratio. Each chip accommodates 3 chambers/sample  
295 and up to 8 samples on each microfluidic chip (**Fig. 1B**). Details on optimization procedures and  
296 imaging are available in **Supplementary Methods**. Individual images were taken for the 4  
297 fluorophore-labeled antibodies (488nm, PE, 647nm and 750nm). (20)

298 Chips containing fixed immunolabelled cells were mounted onto a Nikon TE2000S  
299 inverted fluorescent microscope with a CCD camera (Photometrics, Inc.) and X-cite light source  
300 (Lumen Dynamics Group). The size of each channel had design specifications for edges to align  
301 outside the imaging area. Each channel had a length permitting 8 imageable frames, and all frames

302 were used for image analysis. Imaging parameters were optimized and controlled for to assure all  
303 data could be directly comparable. The light source bulb was evaluated in between each sample  
304 imaged for operational fidelity. Quantitative imaging was obtained by measuring the fluorescence  
305 intensity for each cell area using MetaMorph (Molecular Devices, Version 7.5.6.0). Description  
306 of the MetaMorph software module are available in **Supplementary Methods**.

307

### 308 *Bioinformatic self organizing maps (SOMs) and clustering derivation*

309 Self-organizing maps (SOMs) were generated in R (**Supplemental Methods**). (20,33) A  
310 SOM grid consists of a set of units each characterized by a codebook vector consisting of the four  
311 values (EGFR, PTEN, pAKTAKT and pS6). Input measurements were unit normalized. The  
312 codebook vectors are then randomly initialized based on the input data and a training process  
313 involves repeated presentation of the training data to the map. Each presented datapoint is assigned  
314 to a most similar “winning” grid and the codebook vector of the winning grid is updated using a  
315 weighted average, where the weight is the learning rate  $\alpha$ . Three SOMs are trained for each data  
316 set, and the resulting maps examined for qualitative consistency. Testing various SOM grid sizes  
317 identified a 7 x 7 grid as smallest size to capture differences between gliomasphere samples. (**Fig.**  
318 **2D**).

319 Hierarchical clustering of Neighborhood Frequency Vectors (NFVs) of SOMs (**Fig. 2E,**  
320 **3A**) with waterfall plots displaying differing average intensities values for each cluster were  
321 generated (**Fig. 2B, 2F**). Further analytical details can be found in the **Supplemental Methods**.

322

### 323 *TCGA Microarray Analysis*



324 The Verhaak et al. classification of The Cancer Genome Atlas Glioblastoma database was  
325 used to inform TCGA analysis. (10) The unified gene expression dataset is the combined  
326 expression data from three platforms, Affymetrix HuEx array, Affymetrix U133A array and  
327 Agilent 244K array into a single expression pattern that was used for the original classification of  
328 the TCGA dataset into four categories. The unified gene expression data was combined with tumor  
329 and gliomasphere data which was obtained on the Affymetrix U133 plus 2.0 array and normalized  
330 with the using the R package limma. (34,35) Batch effects were then adjusted using ComBat (36)  
331 on the normalized data. ClaNC, the LDA based centroid classification algorithm used by Verhaak  
332 et al. to create the classifications was then applied to determine a 3-class centroid-based classifier  
333 using only the data from Mesenchymal, Proneural or Classical TCGA samples. (37) The original  
334 dataset has been reported on previously, consisting of 56 Mesenchymal samples, 53 Proneural and  
335 38 Classical samples consisting of 147 total samples excluding the 26 Neural samples were used  
336 in building the classifier. (11) This classifier was then used to assign a TCGA category  
337 (Mesenchymal, Proneural or Classical) to each gliomasphere sample. Because of the lack of gene  
338 name overlap from the Affymetrix U133A array used by TCGA and the Affymetrix U133 plus 2.0  
339 microarray used for our classifications, only 789 of the original 840 genes were used to classify  
340 the samples.

341

#### 342 *Quantitative neurosphere analysis*

343 Neurosphere size and number measurements were obtained with an Acumen eX3 plate  
344 reader in the UCLA California NanoSystems Institute (CNSI) Molecular Shared Screening  
345 Resource core facility. For this, cells were fixed with 1:1 mixture of 4% paraformaldehyde and  
346 100% methanol, 50  $\mu$ L/well. After at least 4 hrs post-fixation the DNA binding Syto-9 dye was

347 added (1:1000 dilution in PBS, 10  $\mu$ L/well). The parameters from data output for each identified  
348 object included peak and total intensities (FLU), diameter (expressed as width and depth in  $\mu$ m),  
349 and spherical volume ( $\mu$ m<sup>3</sup>). Thresholds for false, i.e. non-neurosphere objects (e.g., cell clumps,  
350 single cells, DNA remnants, debris, etc), were defined by: 1) objects with diameter <35  $\mu$ m, 2)  
351 peak intensity <100 FLU or 3) width/depth ratio >4. After setting thresholds, means and standard  
352 error for sphere numbers were calculated based on number of objects from an average of 10 wells  
353 and mean spherical volume per condition to estimate neurosphere size. (38)

354

#### 355 *Erlotinib LC<sub>50</sub>*

356 Assessment of LC<sub>50</sub> via quantitative measurements of sphere size and sphere number was  
357 deployed (**Fig. 3B**). Gliomaspheres were dissociated and resuspended in neurosphere media and  
358 plated into 96 well microplates at a 50 cell/well density for each sample (10 wells/condition).  
359 Experimental parameters included DMSO treated control wells and 5 conditions treated with serial  
360 dilutions of Erlotinib (LC Laboratories) to a final volume 100  $\mu$ L/well. Final DMSO concentration  
361 was equalized to match with DMSO% in highest concentration for each compound. Plates were  
362 incubated and monitored for formation of 10 neurospheres/well, occurring at approximately 16  
363 days post-incubation.

364

#### 365 *Sphere initiation efficiency assays*

366 Limiting dilution assays were performed by single cell dissociation and resuspension in  
367 neurosphere media and plated into 96 well microplates. A measure of sphere forming efficiency  
368 was achieved by seeding incrementally increasing numbers of cells at intervals 50 cells up to 800  
369 cells/well and assessing the number of cells required to achieve ten gliomasphere spheres per well.

370 Plates were incubated and monitored for sphere formation over a 16 day incubation period. The  
371 minimal cell density to achieve 10 gliomasphere neurospheres per well is reported (**Fig. 3C**).

372

### 373 *Patient analyses*

374 This study was overseen and approved by the UCLA Institutional Review Board and  
375 HIPAA compliant. Patient demographics, treatment and outcome data are available in  
376 **Supplemental Table 1**. Eligible patients consisted of full treatment for glioblastoma, including  
377 surgery, chemotherapy and/or radiation therapy and resected tissues capable of renewable  
378 neurosphere formation and maintained for at least three passages. Outcome and survival curves  
379 with their corresponding hazard ratios are available in **Supplementary Methods**.

380

381

382

### 383 **Acknowledgements**

384 All experiments with human cells were conducted under protocols approved and overseen  
385 by the Institutional Review Board of the UCLA Office of Protection of Research Subjects. This  
386 study was supported by the National Natural Science Foundation of China (No. 21505013), the  
387 Natural Science Foundation of Liaoning Province, China (No. 2015020660), and the Dalian  
388 Science and Technology Innovation Funds (No. 2018J13SN087).

389

390

391

392

393

394

395

396

397

398 **Figure 1. Conceptual summary of quantitative single cell heterogeneity profiling of patient-**  
399 **derived glioblastoma tumor initiating cells (TICs).**  
400

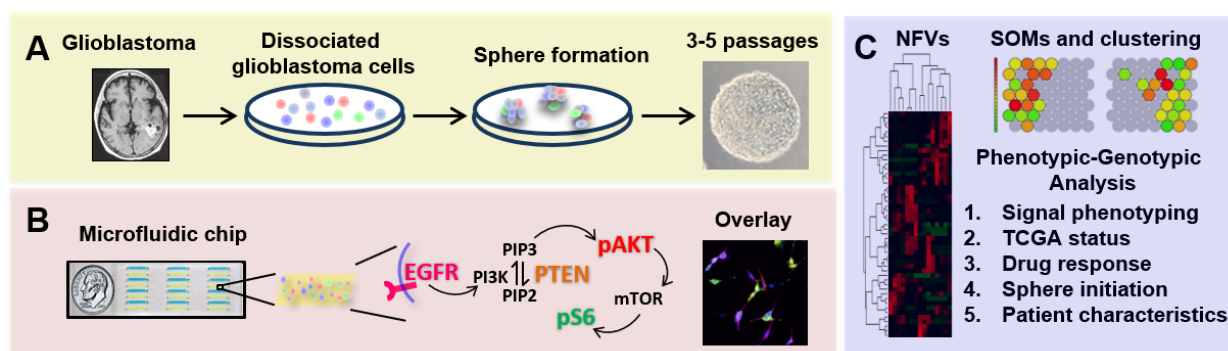

401  
402 A. (Left) T1 weighted MRI of brain tumor in left parieto-occipital lobe (in white). (Middle)  
403 Clinical glioblastoma samples are dissociated into single cells and placed in ‘neurosphere’ serum-  
404 free enrichment media for in vitro selection and expansion of TICs. (Right) Brightfield image of  
405 classic 3D gliomasphere cell line sphere. Colored cells illustrate cellular heterogeneity. B. (Left)  
406 Image of 24 chamber microfluidic device. Chambers are filled with alternating yellow and blue  
407 dyes for visualization. Glioblastoma TIC are dissociated into single cells, loaded into microfluidic  
408 channels, labelled with fluorophore-conjugated antibodies for four signaling proteins (EGFR,  
409 PTEN, pAKT, and pS6) to measure signal through the oncogenic EGFR/PI3K/AKT/mTOR  
410 pathways. [anti-EGFR (purple), anti-PTEN (orange), anti-pAKT (red), and anti-pS6 (green)].  
411 (Right) Fluorescent signal intensity of each the four markers of each cell is via quantification of  
412 immunofluorescent signal intensities of labelled single cells. C. Quantitative analysis involves:  
413 (Left) Unsupervised hierarchical clustering of neighborhood frequency vectors (NFVs) derived  
414 from ~1000 cells of each sample’s individual self-organizing map (SOM). (Top, right) Resultant  
415 self-organizing maps (SOMs) of the two clusters of gliomaspheres. (Lower, right) Phenotypic-  
416 genotypic analysis of clustering included validation by: signal phenotyping, The Cancer Genome  
417 Atlas (TCGA) subgrouping, sphere-based drug response measures, sphere initiation efficiency,  
418 and patient characteristics of patient survival and disease progression.

419 **Figure 2. Single cell measurements of EGFR, PTEN, pAKT and pS6 across patients.**

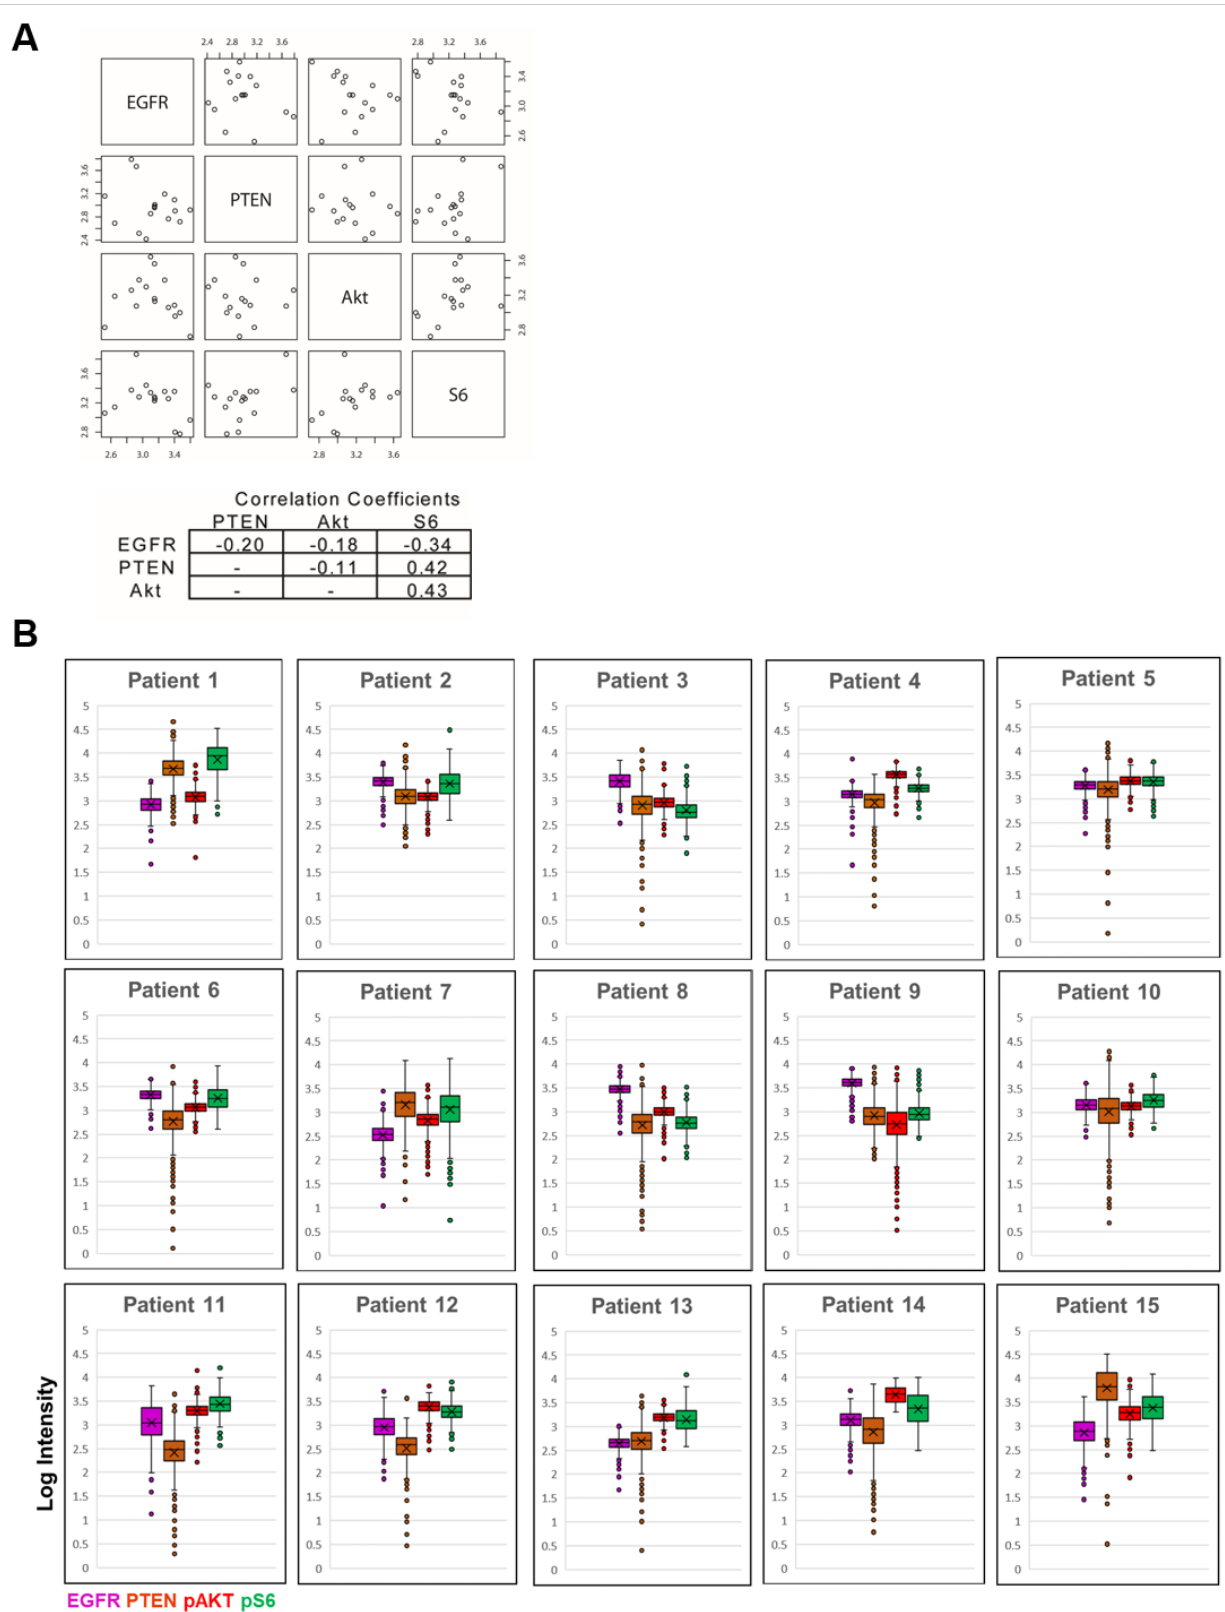

420

421 **A.** Pairwise average linkage using the Pearson correlation clustering of individual mean protein  
422 expression vectors EGFR, PTEN, pAKT and pS6 show correlation coefficients between PTEN  
423 and pS6 and pAKT and pS6. **B.** Boxplot distribution of the complete dataset for each marker of all  
424 cells. Minimum non-outlier value is bottom horizontal line, first quartile represents bottom box,  
425 median is middle horizontal line denoted by an 'X', third quartile represents top box, and  
426 maximum non-outlier value is top horizontal line. Circles represent outlier values. Left, EGFR,  
427 pink. Middle left, PTEN, orange. Middle right, pAKT, red. Right, pS6, green.

428

429

430

431

432

433

434

435

436

437

438

439

440

441

442

443

444 **Figure 3. Multiparameter self-organizing map (SOM) and clustering of human derived**  
 445 **gliomaspheres.**

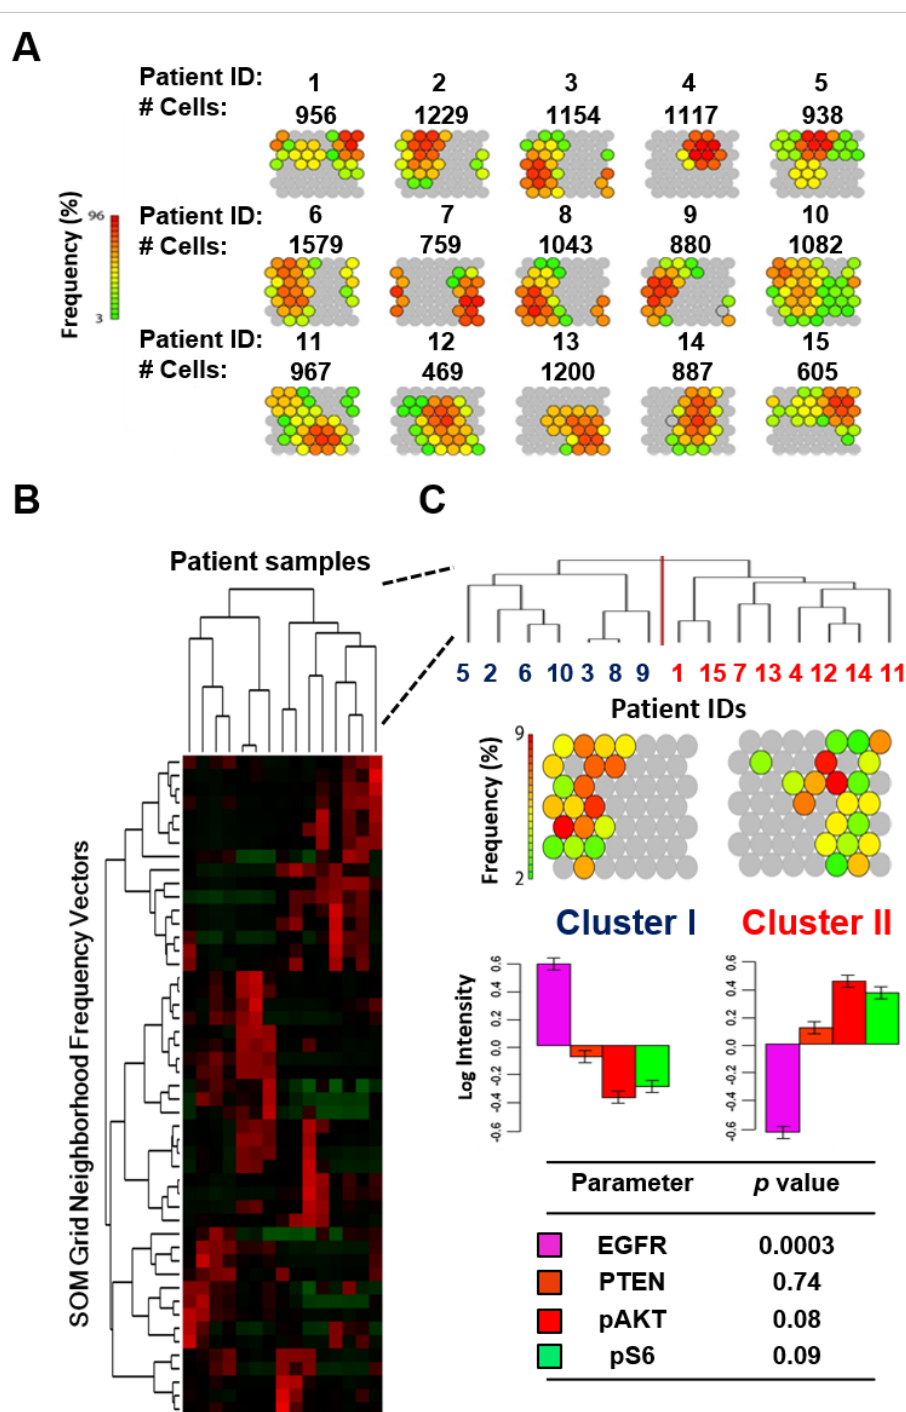

446  
 447 A. Rainbow colored normalized self organizing maps (SOM) display groupings of forty-nine  
 448 molecular phenotypes on a 7 x 7 grid for each of the 15 patients. Red, high percentage of cells.

449 Green, low percentage of cells. Grey, <2% of cells. Above each patient map is the number of  
450 individual cells analyzed. Total cells analyzed=14,866. Range 469-1579 cells. Mean=991 cells. **B.**  
451 SOM derived Neighborhood Frequency Vectors (NFVs) for each of the 15 human-derived brain  
452 gliomasphere lines after unsupervised hierarchical clustering. A heatmap of the dataset where each  
453 row corresponds to one of 49 SOM unit and each column represents a patient gliomasphere line.  
454 Red and green indicate relative high and low neighborhood frequencies, respectively. **C.** (Top)  
455 Enlarged dendrogram reveals two main clusters. (Upper middle) Representative SOMs of each  
456 cluster. Color representation of the frequency at which individual cells are assigned to each SOM  
457 unit. (Lower middle) Waterfall plots of mean expression for each of the four markers in each  
458 cluster of PI3K/AKT/TORC1 pathways mapped. (Bottom) Student's t-test on mean expression  
459 levels reveal significantly differentially expression of EGFR biomarker between each cluster with  
460 borderline significance for pAKT and pS6. EGFR, pink. PTEN, orange. pAKT, red. pS6, green.

461  
462  
463  
464  
465  
466  
467  
468  
469  
470  
471  
472  
473  
474  
475  
476  
477  
478  
479  
480  
481  
482



483 **Figure 4. TCGA status, EGFR single cell profiling, drug response, malignancy profiles and**  
 484 **activation schematic of clustered gliomasphere samples.**

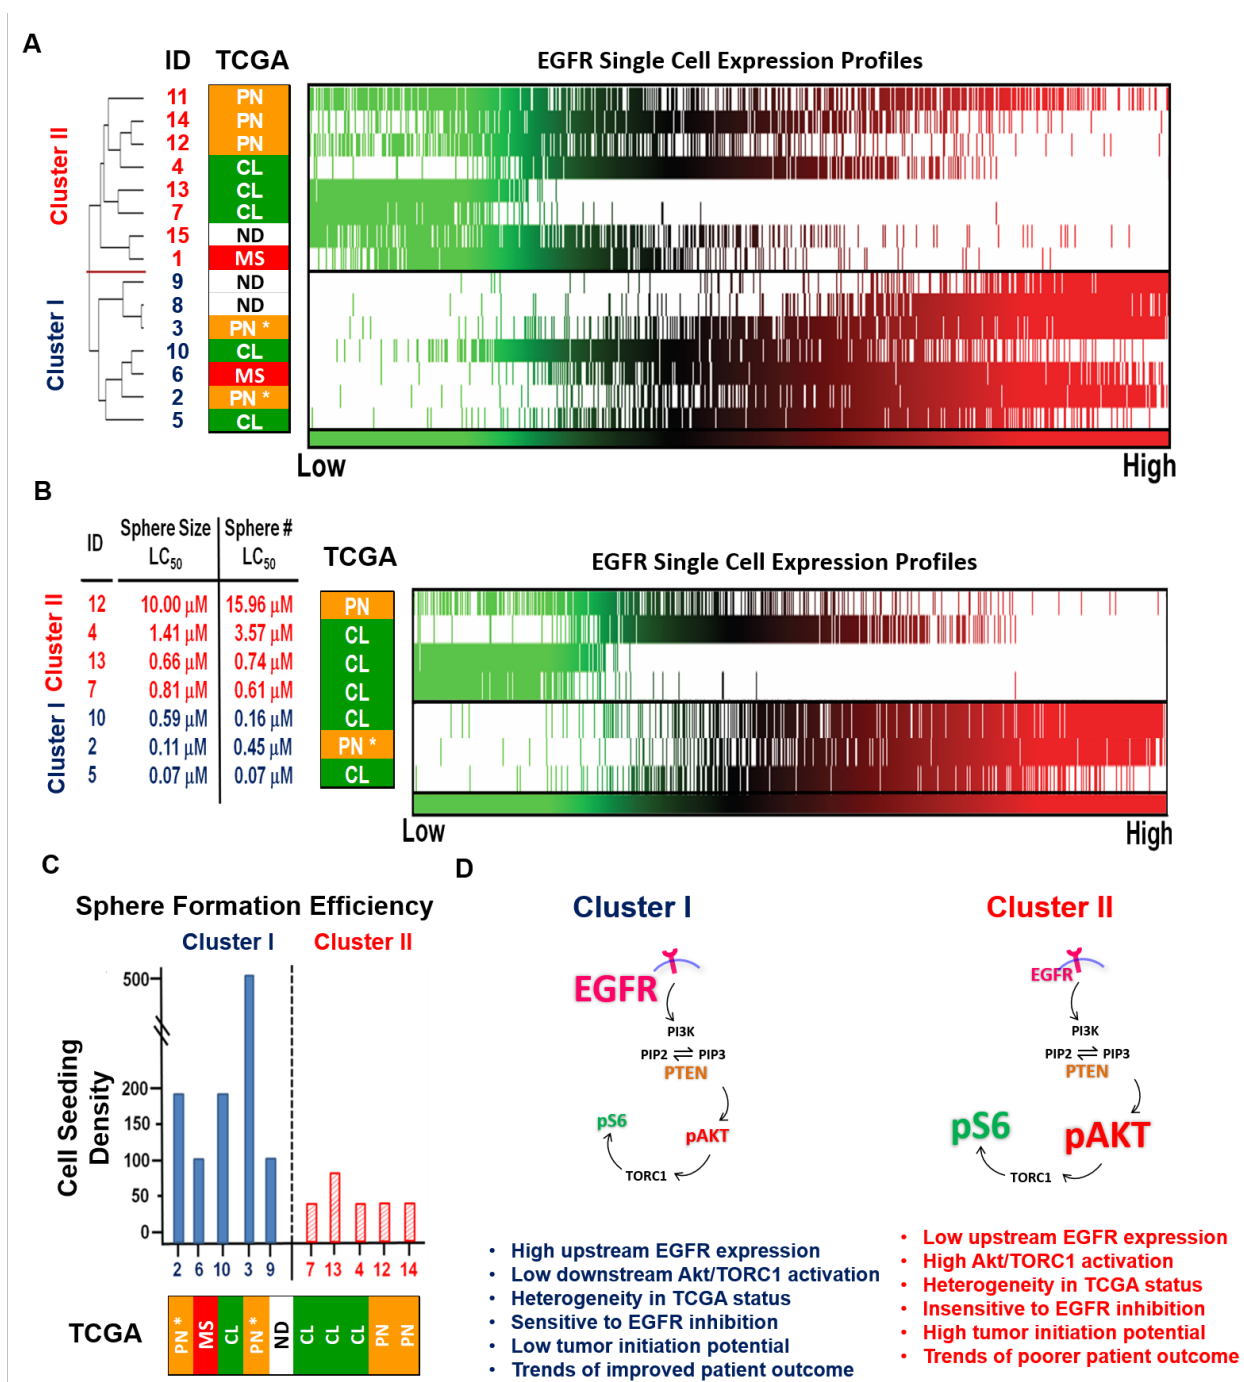

485  
 486 **A.** (Left) The Cancer Genome Atlas (TCGA) groupings. Green, CL=Classical. Yellow,  
 487 PN=Proneural. Red, MS=Mesenchymal. \*IDH1 mutant. ND=No Data. (Right) Diversity of EGFR

488 expression is observed by visualization heatmap of single cell profiling of EGFR expression for  
489 all 15 glioma cancer stem cell (gCSC) lines. Each vertical line corresponds to 1 cell set against a  
490 white background. Green=low expression, Red=high expression. **B.** LC<sub>50</sub>s based on sphere size  
491 and sphere number to EGFR inhibitor erlotinib from a random sampling of 3 gliomasphere lines  
492 from Cluster I and 4 gliomasphere lines from Cluster II. (Middle) TCGA groupings of treated  
493 samples. (Right) Visualization heatmap of single cell EGFR expression of treated samples. **C.** *In*  
494 *vitro* sphere forming efficiency in subsample of 4 gliomasphere lines from each cluster. Y-axis,  
495 number of cells seeded to form 10 neurospheres. (Mann Whitney U Test, two-tailed,  $p < 0.016$ ,  
496 SD = 139.04). **D.** Schematic representation of two gliomasphere clusters. Signal phenotyping  
497 denoted a high EGFR expressing cluster (Cluster I, blue) and activated AKT/TORC1 cluster  
498 (Cluster II, red). Genomic analysis identified evidence of genetic heterogeneity in each cluster.  
499 LC<sub>50</sub>s derived from sphere size and sphere number with the EGFR inhibitor erlotinib revealed the  
500 EGFR expressing Cluster I to be a drug responsive phenotype. Lower sphere initiation efficiency  
501 and trends of improved outcome were observed in EGFR expressing Cluster I in comparison to  
502 activated AKT/TORC1 Cluster II. EGFR (purple), PTEN (orange), (red), and pS6 (green). Text  
503 size is indicator of level of expression.

504  
505  
506  
507  
508  
509  
510  
511  
512  
513  
514  
515  
516  
517

518 **References**

- 519
- 520 1. Battle E, Clevers H. Cancer stem cells revisited. *Nature Medicine* **2017**;23:1124
  - 521 2. Nimmakayala RK, Batra SK, Ponnusamy MP. Unraveling the journey of cancer stem  
522 cells from origin to metastasis. *Biochimica Et Biophysica Acta-Reviews on Cancer*  
523 **2019**;1871:50-63
  - 524 3. Delgado-López PD, Corrales-García EM. Survival in glioblastoma: a review on the  
525 impact of treatment modalities. *Clinical and Translational Oncology* **2016**;18:1062-71
  - 526 4. Phillips HS, Kharbanda S, Chen R, Forrest WF, Soriano RH, Wu TD, *et al.* Molecular  
527 subclasses of high-grade glioma predict prognosis, delineate a pattern of disease  
528 progression, and resemble stages in neurogenesis. *Cancer Cell* **2006**;9:157-73
  - 529 5. Chen J, Li Y, Yu T-S, McKay RM, Burns DK, Kernie SG, *et al.* A restricted cell  
530 population propagates glioblastoma growth after chemotherapy. *Nature* **2012**;488:522-6
  - 531 6. Laks DR, Masterman-Smith M, Visnyei K, Angenieux B, Orozco NM, Foran I, *et al.*  
532 Neurosphere formation is an independent predictor of clinical outcome in malignant  
533 glioma. *Stem Cells* **2009**;27:980-7
  - 534 7. Brennan Cameron W, Verhaak Roel GW, McKenna A, Campos B, Noushmehr H,  
535 Salama Sofie R, *et al.* The Somatic Genomic Landscape of Glioblastoma. *Cell*  
536 **2013**;155:462-77
  - 537 8. Dey-Guha I, Wolfer A, Yeh AC, G. Albeck J, Darp R, Leon E, *et al.* Asymmetric cancer  
538 cell division regulated by AKT. *Proceedings of the National Academy of Sciences*  
539 **2011**;108:12845
  - 540 9. Srivas R, Shen JP, Yang CC, Sun SM, Li J, Gross AM, *et al.* A Network of Conserved  
541 Synthetic Lethal Interactions for Exploration of Precision Cancer Therapy. *Molecular cell*  
542 **2016**;63:514-25
  - 543 10. Verhaak RGW, Hoadley KA, Purdom E, Wang V, Qi Y, Wilkerson MD, *et al.* Integrated  
544 genomic analysis identifies clinically relevant subtypes of glioblastoma characterized by  
545 abnormalities in PDGFRA, IDH1, EGFR, and NF1. *Cancer cell* **2010**;17:98-110
  - 546 11. Laks DR, Crisman TJ, Shih MYS, Mottahedeh J, Gao F, Sperry J, *et al.* Large-scale  
547 assessment of the gliomasphere model system. *Neuro-oncology* **2016**;18:1367-78
  - 548 12. Jiang H, Gao HP, Kong J, Song B, Wang P, Shi BZ, *et al.* Selective Targeting of  
549 Glioblastoma with EGFRvIII/EGFR Bitargeted Chimeric Antigen Receptor T Cell.  
550 *Cancer Immunology Research* **2018**;6:1314-26
  - 551 13. Gedeon PC, Schaller TH, Chitneni SK, Choi BD, Kuan CT, Suryadevara CM, *et al.* A  
552 Rationally Designed Fully Human EGFRvIII:CD3-Targeted Bispecific Antibody  
553 Redirects Human T Cells to Treat Patient-derived Intracerebral Malignant Glioma. *Clin*  
554 *Cancer Res* **2018**;24:3611-31
  - 555 14. Bhat KPL, Balasubramaniyan V, Vaillant B, Ezhilarasan R, Hummelink K,  
556 Hollingsworth F, *et al.* Mesenchymal differentiation mediated by NF- $\kappa$ B promotes  
557 radiation resistance in glioblastoma. *Cancer cell* **2013**;24:331-46
  - 558 15. Cusulin C, Chesnelong C, Bose P, Bilenky M, Kopciuk K, Chan JA, *et al.* Precursor  
559 States of Brain Tumor Initiating Cell Lines Are Predictive of Survival in Xenografts and  
560 Associated with Glioblastoma Subtypes. *Stem cell reports* **2015**;5:1-9
  - 561 16. Furnari FB, Cloughesy TF, Cavenee WK, Mischel PS. Heterogeneity of epidermal  
562 growth factor receptor signalling networks in glioblastoma. *Nat Rev Cancer* **2015**;15:302

- 563 17. Verhaak RG, Hoadley KA, Purdom E, Wang V, Qi Y, Wilkerson MD, *et al.* Integrated  
564 genomic analysis identifies clinically relevant subtypes of glioblastoma characterized by  
565 abnormalities in PDGFRA, IDH1, EGFR, and NF1. *Cancer Cell* **2010**;17:98-110
- 566 18. Tome-Garcia J, Erfani P, Nudelman G, Tsankov AM, Katsyv I, Tejero R, *et al.* Analysis  
567 of chromatin accessibility uncovers TEAD1 as a regulator of migration in human  
568 glioblastoma. *Nat Comm* **2018**;9:13
- 569 19. Capuani F, Conte A, Argenzio E, Marchetti L, Priami C, Polo S, *et al.* Quantitative  
570 analysis reveals how EGFR activation and downregulation are coupled in normal but not  
571 in cancer cells. *Nat Comm* **2015**;6:7999
- 572 20. Sun J, Masterman-Smith MD, Graham NA, Jiao J, Mottahedeh J, Laks DR, *et al.* A  
573 microfluidic platform for systems pathology: multiparameter single-cell signaling  
574 measurements of clinical brain tumor specimens. *Cancer Res* **2010**;70:6128-38
- 575 21. Leu S, von Felten S, Frank S, Vassella E, Vajtai I, Taylor E, *et al.* IDH/MGMT-driven  
576 molecular classification of low-grade glioma is a strong predictor for long-term survival.  
577 *Neuro-Oncology* **2013**;15:469-79
- 578 22. Farhy C, Hariharan S, Ylanko J, Orozco L, Zeng F-Y, Pass I, *et al.* Improving drug  
579 discovery using image-based multiparametric analysis of the epigenetic landscape. *eLife*  
580 **2019**;8:e49683
- 581 23. Lin D, Li P, Feng J, Lin Z, Chen X, Yang N, *et al.* Screening Therapeutic Agents  
582 Specific to Breast Cancer Stem Cells Using a Microfluidic Single-Cell Clone-Forming  
583 Inhibition Assay. *Small*;0:1901001
- 584 24. Filbin MG, Tirosch I, Hovestadt V, Shaw ML, Escalante LE, Mathewson ND, *et al.*  
585 Developmental and oncogenic programs in H3K27M gliomas dissected by single-cell  
586 RNA-seq. *Science* **2018**;360:331-5
- 587 25. Hu AX, Adams JJ, Vora P, Qazi M, Singh SK, Moffat J, *et al.* EPH Profiling of BTIC  
588 Populations in Glioblastoma Multiforme Using CyTOF. In: Singh SK, Venugopal C,  
589 editors. *Brain Tumor Stem Cells: Methods and Protocols*. New York, NY: Springer New  
590 York; 2019. p 155-68.
- 591 26. Lan X, Jörg DJ, Cavalli FMG, Richards LM, Nguyen LV, Vanner RJ, *et al.* Fate mapping  
592 of human glioblastoma reveals an invariant stem cell hierarchy. *Nature* **2017**;549:227
- 593 27. Kelly JP, Stechishin O, Chojnacki A, Lun X, Sun B, Senger DL, *et al.* Proliferation of  
594 human glioblastoma stem cells occurs independently of exogenous mitogens. *Stem Cells*  
595 **2009**;27:1722-33
- 596 28. Wei W, Shin YS, Xue M, Matsutani T, Masui K, Yang H, *et al.* Single-Cell  
597 Phosphoproteomics Resolves Adaptive Signaling Dynamics and Informs Targeted  
598 Combination Therapy in Glioblastoma. *Cancer cell* **2016**;29:563-73
- 599 29. Luchman HA, Stechishin ODM, Nguyen SA, Lun XQ, Cairncross JG, Weiss S. Dual  
600 mTORC1/2 blockade inhibits glioblastoma brain tumor initiating cells and synergizes  
601 with temozolomide to increase orthotopic xenograft survival. *Clinical Cancer Research*  
602 **2014**;20:5756-67
- 603 30. Euskirchen P, Radke J, Schmidt MS, Schulze Heuling E, Kadikowski E, Maricos M, *et*  
604 *al.* Cellular heterogeneity contributes to subtype-specific expression of ZEB1 in human  
605 glioblastoma. *PloS one* **2017**;12:e0185376-e
- 606 31. Han Y-P, Enomoto A, Shiraki Y, Wang S-Q, Wang X, Toyokuni S, *et al.* Significance of  
607 low mTORC1 activity in defining the characteristics of brain tumor stem cells. *Neuro-*  
608 *oncology* **2017**;19:636-47

- 609 32. Panosyan EH, Laks DR, Masterman-Smith M, Mottahedeh J, Yong WH, Cloughesy TF,  
610 *et al.* Clinical outcome in pediatric glial and embryonal brain tumors correlates with in  
611 vitro multi-passageable neurosphere formation. *Pediatr Blood Cancer* **2010**;55:644-51  
612 33. Wehrens R, Buydens LMC. Self- and super-organizing maps in R: The Kohonen  
613 package. *J Stat Soft* **2007**:1-19  
614 34. Smyth GK. limma: Linear Models for Microarray Data. In: Gentleman R, Carey VJ,  
615 Huber W, Irizarry RA, Dudoit S, editors. *Bioinformatics and Computational Biology*  
616 *Solutions Using R and Bioconductor*. New York, NY: Springer New York; 2005. p 397-  
617 420.  
618 35. RC T. 2013 R, A language and environment for statistical computing. <[http://www.R-](http://www.R-project.org/)  
619 [project.org/](http://www.R-project.org/)>.  
620 36. Johnson WE, Li C, Rabinovic A. Adjusting batch effects in microarray expression data  
621 using empirical Bayes methods. *Biostatistics* **2007**;8:118-27  
622 37. Dabney AR. ClaNC: point-and-click software for classifying microarrays to nearest  
623 centroids. *Bioinformatics* **2006**;22:122-3  
624 38. Visnyei K, Onodera H, Damoiseaux R, Saigusa K, Petrosyan S, De Vries D, *et al.* A  
625 molecular screening approach to identify and characterize inhibitors of glioblastoma stem  
626 cells. *Mol Cancer Ther* **2011**;10:1818-28  
627

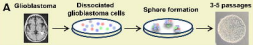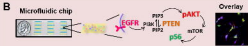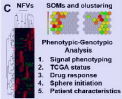

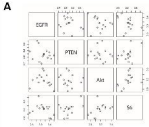

Correlation Coefficients

|      | PTEN  | Akt   | S6    |
|------|-------|-------|-------|
| EGFR | -0.20 | -0.18 | -0.34 |
| PTEN | -     | 0.11  | 0.42  |
| Akt  | -     | -     | 0.43  |

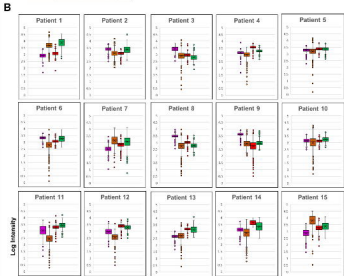

EGFR PTEN pAkt pS6

**A**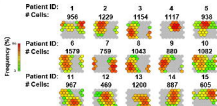**B**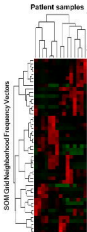**C**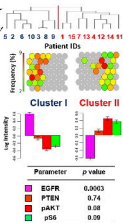



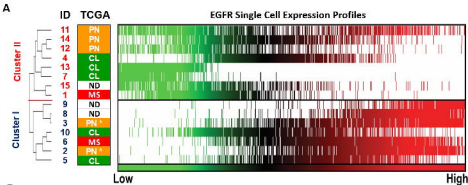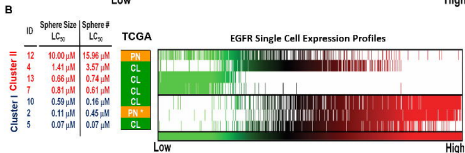

**C** Sphere Formation Efficiency

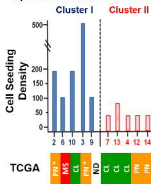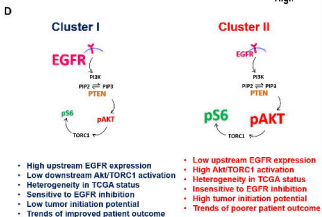

Source: https://www.biorxiv.org/content/10.1101/2020.01.14.900506v1.full.pdf
